# Supplementary material for: Childhood Leukemia Increased Significantly in Wales and Scotland After Chernobyl: A Biological Explanation
Source: Preprints.org preprint supplement (doi:10.20944/preprints202305.0237.v1), 2023-05-04
Supplement: Supplementary file 1 [file supplementary]

**Supplementary Table 1**. Childhood leukemia numbers by year from the CCRG data, the method of aggregation into birth year cohort totals (diagonal alternate year shading), exposure year totals and whole-body Caesium-137 trends measured in Harwell, England. The Birth Year column shows total leukemias in the birth year cohort, for example, those born in 1986 are age 1 in 1987, age 2 in 1988, age 3 in 1989 and age 4 in 1990. The total number of cases is then placed in the birth year row. Cells containing cases in children who were in iutero before Chernobyl are shown in blue. **Exposure year in bold type.** The exposure year totals are the row totals for each year. Cs-137 activity in Bq. NA is Not Assessed.

The full 0-9y leukemia database as supplied to the CERRIE Epidemiology sub-committee may be found at www.llrc.org

| year | Age 0 | Age 1 | Age 2 | Age 3 | Age 4 | Exposure  Year | Birth  Year | Cs-137  (Bq) |
| --- | --- | --- | --- | --- | --- | --- | --- | --- |
| 1970 | 5 | 3 | 13 | 14 | 8 | 43 | 29 |  |
| 1971 | 1 | 1 | 8 | 8 | 11 | 29 | 26 |  |
| 1972 | 4 | 4 | 9 | 6 | 5 | 28 | 36 |  |
| 1973 | 5 | 5 | 8 | 6 | 8 | 32 | 36 |  |
| 1974 | 2 | 4 | 14 | 7 | 8 | 35 | 35 |  |
| 1975 | 0 | 9 | 12 | 5 | 6 | 32 | 34 |  |
| 1976 | 3 | 6 | 8 | 11 | 8 | 36 | 25 |  |
| 1977 | 4 | 2 | 9 | 9 | 4 | 28 | 25 |  |
| 1978 | 2 | 4 | 5 | 12 | 7 | 30 | 30 |  |
| 1979 | 0 | 4 | 9 | 9 | 7 | 29 | 28 |  |
| 1980 | 2 | 6 | 12 | 4 | 6 | 30 | 27 |  |
| 1981 | 3 | 3 | 6 | 8 | 4 | 24 | 31 |  |
| 1982 | 1 | 3 | 9 | 11 | 4 | 28 | 30 |  |
| 1983 | 1 | 3 | 16 | 5 | 5 | 30 | 32 |  |
| 1984 | 3 | 8 | 9 | 5 | 8 | 33 | 31 | NA |
| 1985 | 1 | 1 | 6 | 10 | 4 | 22 | 25 | 0* |
| **1986** | 1 | 4 | 6 | 9 | 7 | **27** | **40** | 180 |
| **1987** | 6 | 7 | 10 | 12 | 8 | **43** | **39** | 260 |
| **1988** | 6 | 3 | 13 | 5 | 9 | **36** | **45** | 140 |
| **1989** | 3 | 10 | 10 | 12 | 5 | **40** | **33** | 60 |
| **1990** | 3 | 6 | 9 | 14 | 7 | **39** | **40** | 25 |
| 1991 | 1 | 4 | 8 | 10 | 6 | 29 | 29 | 15 |
| 1992 | 3 | 4 | 15 | 4 | 10 | 36 | 27 | NA |
| 1993 | 4 | 3 | 7 | 6 | 12 | 32 | 33 | NA |
| 1994 | 2 | 3 | 12 | 10 | 12 | 39 |  | NA |
| 1995 | 3 | 4 | 14 | 6 | 7 | 34 |  |  |
| 1996 | 3 | 5 | 8 | 7 | 3 | 26 |  |  |

* assumed zero Cs-137 whole body result in 1985
